# Supplementary material for: Neutron diffraction and DFT studies of oxygen defect and transport in higher-order Ruddlesden–Popper phase materials
Source: Royal Society of Chemistry journal article supplement (doi:10.1039/d3ra01772a), 2023-01-01
Supplement: d3ra01772a1.pdf [file d3ra01772a1.pdf]

## Supplementary Information

### Neutron Diffraction and DFT Studies of Oxygen Defect and Transport in Higher-Order Ruddlesden-Popper Phase Materials

*Mudasir A. Yattoo<sup>1,2</sup>, Ieuan Seymour<sup>1</sup> and Stephen J. Skinner<sup>1,2</sup>*

<sup>1</sup>Imperial College London, Department of Materials, Faculty of Engineering, Exhibition Road, SW7 2AZ. United Kingdom

<sup>2</sup>EPSRC Centre for Doctoral Training in Advanced Characterisation of Materials, Exhibition Road, SW7 2AZ. United Kingdom

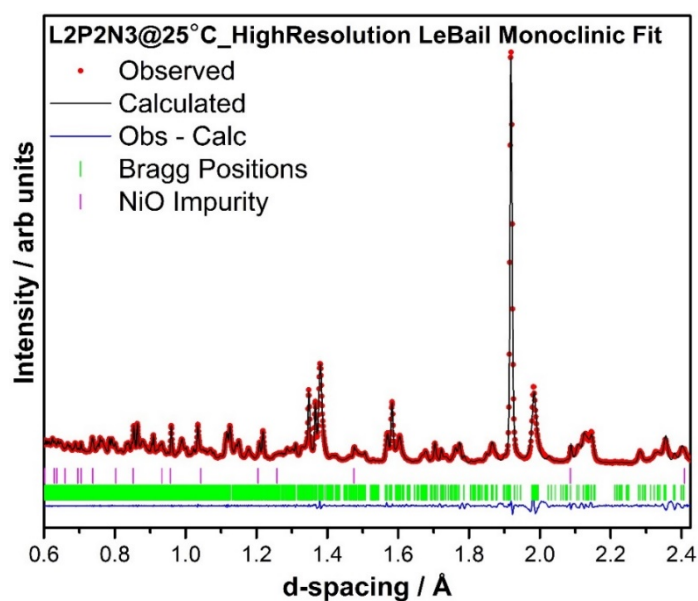

Figure S1. Le Bail refinement of the room-temperature high-resolution (bank 5) L2P2N3 data set in monoclinic  $P12_1/a1$  space group ( $\chi^2 = 4.10$ ;  $R_p = 1.7\%$  and  $wR_p = 1.1\%$ ).

Table S1. Fractional atomic coordinates and thermal parameters obtained after Rietveld refinement of

| A        | x    | y          | z         | Uiso      |
|----------|------|------------|-----------|-----------|
| La/Pr(1) | 0.0  | -0.0043(2) | 0.4328(2) | 0.008(3)  |
| La/Pr(2) | 0.0  | -0.0122(2) | 0.2990(2) | 0.013(6)  |
| Ni(1)    | 0.0  | 0.0        | 0.0       | 0.008 (1) |
| Ni(2)    | 0.0  | -0.0015(1) | 0.1380(1) | 0.009(8)  |
| O(1)     | 0.25 | 0.25       | 0.0067(7) |           |
| O(2)     | 0.0  | 0.9549(1)  | 0.0687(3) |           |
| O(3)     | 0.25 | 0.25       | 0.135(3)  |           |
| O(4)     | 0.0  | 0.0377(2)  | 0.2134(3) |           |
| O(5)     | 0.25 | 0.75       | 0.1457(3) |           |

L3P1N3 ND patterns recorded at 250 °C using orthorhombic model (*Bmab*).

Table S2. Fractional atomic coordinates and thermal parameters obtained after Rietveld refinement of L3P1N3 ND patterns recorded at 800 °C using tetragonal model (*I4/mmm*).

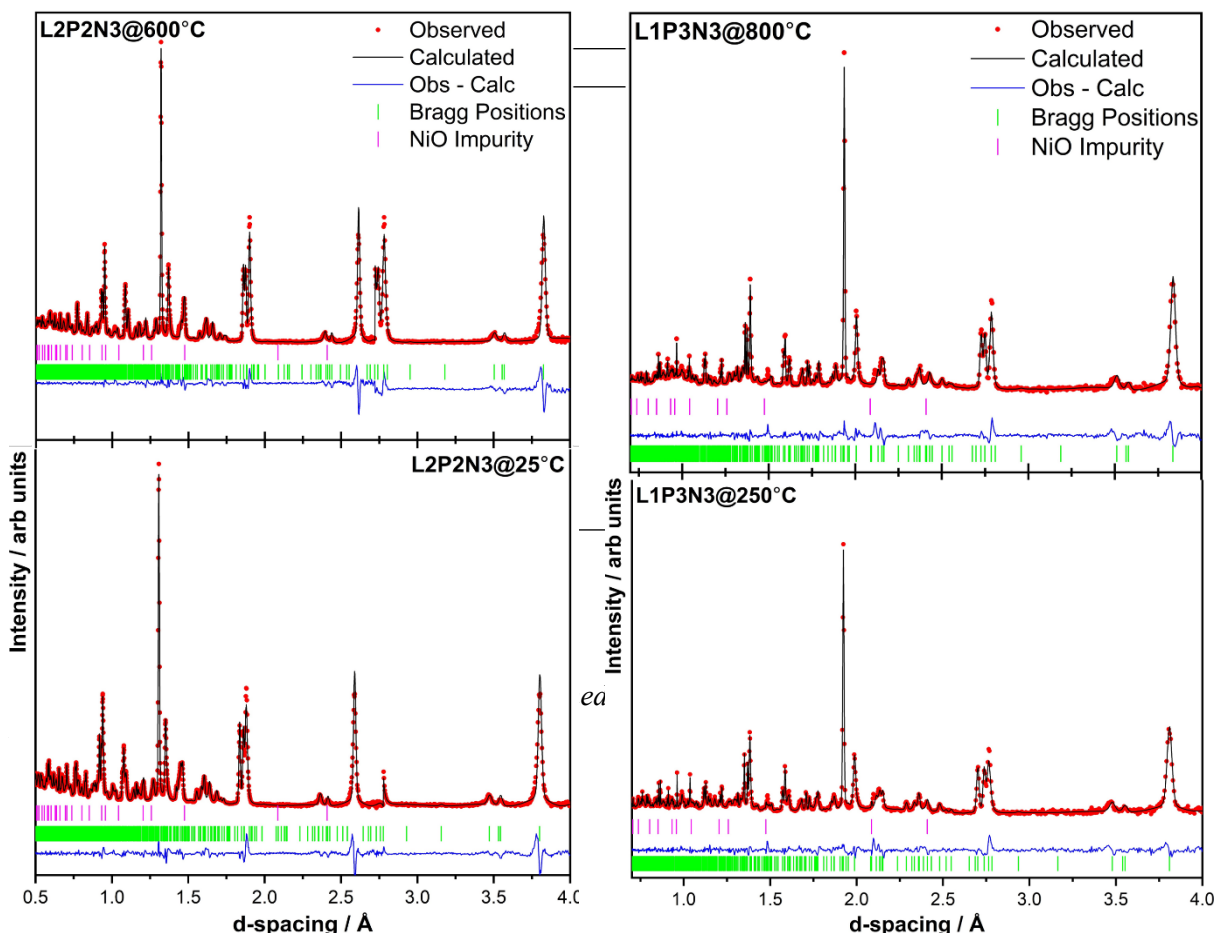

Figure S2. Rietveld refinement of the two data sets obtained at 25 °C ( $\chi^2 = 1.91$ ;  $R_p = 6.5\%$  and  $wR_p = 3.0\%$ ) and 600 °C ( $\chi^2 = 1.52$ ;  $R_p = 5.7\%$  and  $wR_p = 2.7\%$ ). A ~2% impurity of NiO was detected and was refined in cubic *Fm3m* space symmetry.

Figure S3. Rietveld refinement of the two data sets obtained at 250 °C ( $\chi^2 = 11.47$ ;  $R_p = 8.7\%$  and  $wR_p = 7.6\%$ ) and 800 °C ( $\chi^2 = 14.36$ ;  $R_p = 6.9\%$  and  $wR_p = 5.9\%$ ). A ~2% impurity of NiO was detected and was refined in cubic *Fm3m* space symmetry.

| Atom  | Atomic displacement parameters ( $\text{\AA}^2$ ) $\times 100$ |          |          | Fractional occupancy |
|-------|----------------------------------------------------------------|----------|----------|----------------------|
|       | $U_{11}/U_{iso}$                                               | $U_{22}$ | $U_{33}$ |                      |
| La(1) | 1.9(3)                                                         |          |          | 0.77(3)              |
| Pr(1) | 1.9(3)                                                         |          |          | 0.33(3)              |
| La(2) | 1.8(7)                                                         |          |          | 0.86(5)              |
| Pr(2) | 1.8(7)                                                         |          |          | 0.14(5)              |
| O(1)  | 0.7(6)                                                         | 6.6(3)   | 11.0(4)  | 0.97(3)              |
| O(2)  | 5.4(8)                                                         | 5.4(8)   | 3.8(9)   | 0.97(3)              |
| O(3)  | 0.6(9)                                                         | 3.5(1)   | 3.5(1)   | 0.93(2)              |
| O(4)  | 6.3(3)                                                         | 6.3(3)   | 1.6(1)   | 1.0                  |

Table S4. Rietveld refinement parameters obtained for the LIP3N3 composition recorded at 800°C

| Atom  | Atomic displacement parameters ( $\text{\AA}^2$ ) $\times 100$ |          |          |          |          | Fractional occupancy |
|-------|----------------------------------------------------------------|----------|----------|----------|----------|----------------------|
|       | $U_{11}/U_{iso}$                                               | $U_{22}$ | $U_{33}$ | $U_{12}$ | $U_{23}$ |                      |
| La(1) | 3.5(3)                                                         |          |          |          |          | 0.32(6)              |
| Pr(1) | 3.5(3)                                                         |          |          |          |          | 0.68(6)              |
| La(2) | 1.7(4)                                                         |          |          |          |          | 0.39(7)              |
| Pr(2) | 1.7(4)                                                         |          |          |          |          | 0.61(7)              |
| O(1)  | 6.8(1)                                                         | 5.6(1)   | 1.7(1)   | 6.1(8)   |          | 0.97(5)              |
| O(2)  | 5.3(8)                                                         | 0.8(7)   | 3.9(8)   |          | 1.0(8)   | 0.96(3)              |
| O(3)  | 0.5(6)                                                         | 3.1(1)   | 2.6(1)   | 0.6(6)   |          | 0.83(5)              |
| O(4)  | 3.5(1)                                                         | 11.2(1)  | 3.5(7)   |          | 3.3(1)   | 1.0                  |
| O(5)  | 1.3(7)                                                         | 1.9(5)   | 2.1(7)   | 0.3(4)   |          | 1.0                  |

with orthorhombic model (*Bmab*).

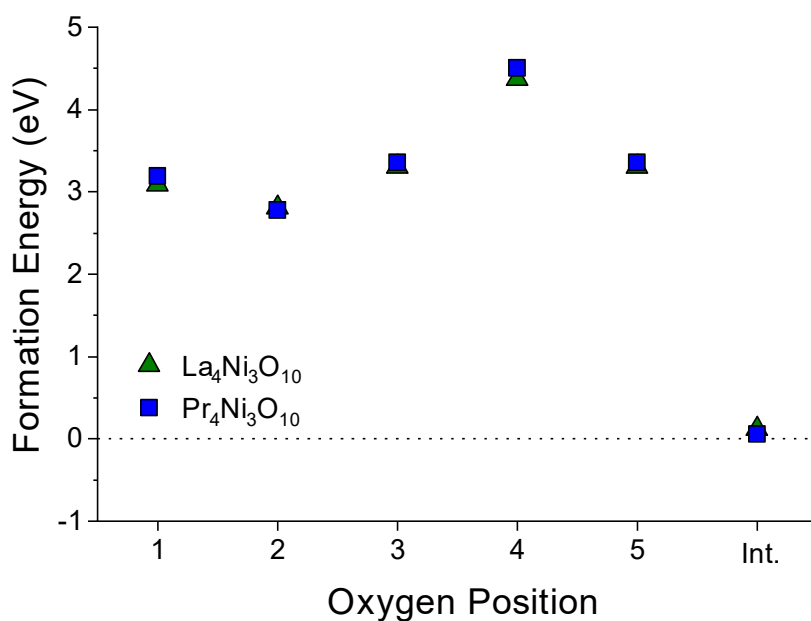

Figure S4: Plot of formation energy for oxygen vacancies at the O1–O5 sites in the Bmab primitive cell structures of  $\text{La}_4\text{Ni}_3\text{O}_{10}$  and  $\text{Pr}_4\text{Ni}_3\text{O}_{10}$ , with 2 formula units per cell ( $\text{M}_8\text{Ni}_6\text{O}_{20\pm 1}$ ) at  $T = 0$  K without a  $U$  correction on Ni.

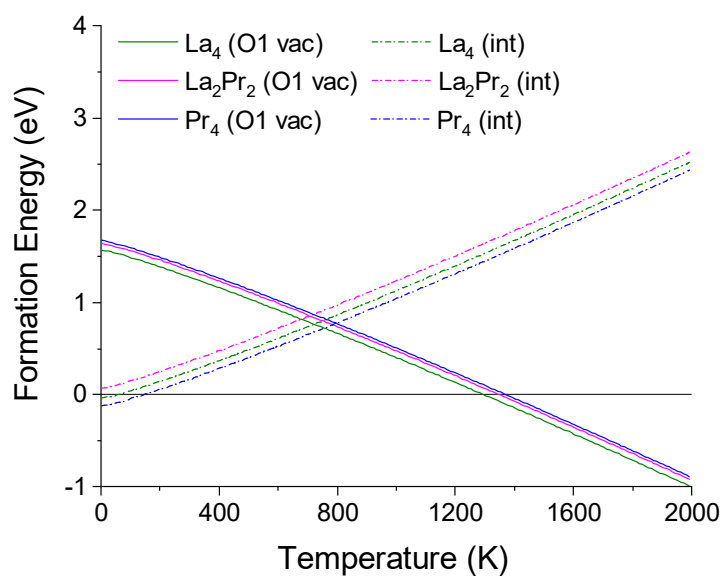

Figure S5. Variation in oxygen interstitial (int.) and O1 vacancy formation energy as a function of temperature for lowest energy  $\text{La}_4\text{Ni}_3\text{O}_{10}$ ,  $\text{La}_2\text{Pr}_2\text{Ni}_3\text{O}_{10}$  and  $\text{Pr}_4\text{Ni}_3\text{O}_{10}$  structures.
